# Supplementary material for: NF-κB inhibition in keratinocytes causes RIPK1-mediated necroptosis and skin inflammation
Source: Life Sci Alliance. 2021 Apr 15;4(6):e202000956. doi: 10.26508/lsa.202000956 (PMC8091601; doi:10.26508/lsa.202000956)
Supplement: Supplementary file 2 [file LSA-2020-00956_SdataF2.xlsx]

## Sheet: Fig. 2B
	Epi. Thick.					Infl. Area
Genotypes	Ikk2fl/fl	IKK2E-KO	Ikk2fl/fl Faddfl/fl RIPK3-/-	IKK2EKO FADDEKO RIPK3-/-		Ikk2fl/fl	IKK2E-KO	Ikk2fl/fl Faddfl/fl RIPK3-/-	IKK2EKO FADDEKO RIPK3-/-
	14.5333	87.1333	14.8667	20.2		0	100	0	0
	13.5333	82.8667	14.6667	22.2667		0	100	0	0
	17.3333	86.9333	15.2667	20		0	100	0	0
	13.4	92.0667	15.5	20.5714		0	90	0	0
	13.9333	89.8				0	100
		91.6667					100

## Sheet: Fig. 2C
Genes	Il24					Il1b					Ccl3					Ccl4
Genotype	Ikk2fl/fl	IKK2E-KO	Ikk2fl/fl Faddfl/fl RIPK3-/-	IKK2EKO FADDEKO RIPK3-/-		Ikk2fl/fl	IKK2E-KO	Ikk2fl/fl Faddfl/fl RIPK3-/-	IKK2EKO FADDEKO RIPK3-/-		Ikk2fl/fl	IKK2E-KO	Ikk2fl/fl Faddfl/fl RIPK3-/-	IKK2EKO FADDEKO RIPK3-/-		Ikk2fl/fl	IKK2E-KO	Ikk2fl/fl Faddfl/fl RIPK3-/-	IKK2EKO FADDEKO RIPK3-/-
	0.009863	1.20603	0.001082	0.00058		0.002673	0.0312994	0.004601	0.004431		0.014634	0.299487	0.006964	0.008343		0.0173687	0.089277	0.002484	0.001912
	0.000511	0.434478	0.018483	0.000655		0.004577	0.053355	0.178874	0.009908		0.007033	0.266431	0.002608	0.005861		0.00781813	0.09516	0.003556	0.002852
	0.000161	1.24518	0.000794	0.001033		0.003543	0.0790405	0.005107	0.003272		0.004751	0.56147	0.005188	0.004392		0.0085063	0.245185	0.004455	0.00557
	0.005848	2.14676	0.007932	0.000148		0.223952	0.0896307	0.019244	0.018087		0.218541	0.372792	0.00511	0.036166		0.0773575	0.18448	0.002293	0.02007
	0.001467	1.37687	0	0.000122		0.200088	0.144387	0.019369	0.004303		0.314496	0.479327	0.033021	0.007252		0.0831195	0.111119	0.007029	0.000354
	0.000743	1.51363	0.001901	0		0.014655	0.207176	0.105071	0.013297		0.047178	0.524702	0.308253	0.004789		0.0115529	0.124881	0.082214	0.000999
	0.006752	0.999973	0.035029	0.00030175		0.019446	0.296207	0.05951	0.00511741		0.070712	0.909976	0.013763	0.004215		0.0179375	0.203974	0.003495	0.000648
		0.895086	9.3e-05	0.00033666			0.274015	0.003338	0.011928			0.762286	0.059376	0.021628			0.167567	0.007761	0.005179
			0.001197					0.083637	0.005085				0.042706	0.007361				0.009382	0.001708
