# Supplementary material for: NF-κB inhibition in keratinocytes causes RIPK1-mediated necroptosis and skin inflammation
Source: Life Sci Alliance. 2021 Apr 15;4(6):e202000956. doi: 10.26508/lsa.202000956 (PMC8091601; doi:10.26508/lsa.202000956)
Supplement: Supplementary file 7 [file LSA-2020-00956_SdataF4.xlsx]

## Sheet: Fig. 1b
	%death
	IKK2fl/fl (Unstimulated)	IKK2fl/fl (TNF)	IKK2E-KO (Unstimulated)	IKK2E-KO (TNF)
	100	100	100	49
	100	100	100	70
	100	100	100	55
	100	100	100	42
	100	100	100	43

## Sheet: Fig. 4B
	Epi. Thick.						Infl. Area
Genotypes	Ikk2fl/fl	IKK2E-KO	Ikk2fl/fl Mlkl-/-	IKK2EKO Mlkl-/-		Genotypes	Ikk2fl/fl	IKK2E-KO	Ikk2fl/fl Mlkl-/-	IKK2EKO Mlkl-/-
	14.5333	87.1333	14.3	38.6			0	100	0	0
	13.5333	82.8667	12.8667	20.3533			0	100	0	25
	17.3333	86.9333	11.9333	29.5			0	100	0	0
	13.4	92.0667	17.9333	16.4667			0	90	0	22.2222
	13.9333	89.8	13.4	30.1333			0	100		12.5
		91.6667	16.2667	24.2				100		11.1111
				24.1333						14.2857
				24						75

## Sheet: Fig 4C
Genes	Il1b					Il24					Ccl3					Ccl4
Genotype	Ikk2fl/fl	IKK2E-KO	Ikk2fl/fl Mlkl-/-	IKK2EKO Mlkl-/-		Ikk2fl/fl	IKK2E-KO	Ikk2fl/fl Mlkl-/-	IKK2EKO Mlkl-/-		Ikk2fl/fl	IKK2E-KO	Ikk2fl/fl Mlkl-/-	IKK2EKO Mlkl-/-		Ikk2fl/fl	IKK2E-KO	Ikk2fl/fl Mlkl-/-	IKK2EKO Mlkl-/-
	0.002722	0.029857	0.006378	0.081143		0.001207	1.03893	0	0.009971		0.000558	0.046976	0.012746	0.156579		0.000583	0.022499	0.007082	0.026031
	0.040092	0.031541	0.009191	0.034194		0.004162	0.464035	0.005367	0.045742		0.131126	0.045981	0.012746	0.042446		0.028479	0.015793	0.002172	0.024655
	0.003548	0.065194	0.12074	0.050991		0.002094	1.15448	0	0.580354		0.005712	0.134673	0.128746	0.022047		0.000312	0.059614	0.054425	0.01704
	0.005394	0.066283	0.019763	0.058919		0.001778	2.13541	0.002441	0.091278		0.00498	0.128384	0.022864	0.044003		0.000688	0.044061	0.001755	0.027841
	0.223952	0.144387	0.003316	0.075176		0.005848	1.37687	0	0.037782		0.218541	0.479327	0.002604	0.134817		0.077358	0.111119	0.000882	0.018751
	0.200088	0.207176	0.074797	0.006412		0.001467	1.51363	0.001308	0.000313		0.314496	0.524702	0.134067	0.01451		0.083119	0.124881	0.020368	0.003884
	0.014655	0.296207	0.017593	0.008184		0.000743	0.999973	0	0.002032		0.047178	0.909976	0.011692	0.0275328		0.011553	0.203974	0.00067	0.003593
	0.019446	0.274015	0.257804			0.006752	0.895086	0.001252			0.070712	0.762286				0.017937	0.167567	0.151594
								0.001252
